# Supplementary material for: Platelet-Rich Plasma Prevents In Vitro Transforming Growth Factor-β1-Induced Fibroblast to Myofibroblast Transition: Involvement of Vascular Endothelial Growth Factor (VEGF)-A/VEGF Receptor-1-Mediated Signaling
Source: PubMed Central journal article supplement (PMC6162453; doi:10.3390/cells7090142), 2018-09-19
Supplement: cells-07-00142-s001.pdf [file cells-07-00142-s001.pdf]

## Supplementary Materials

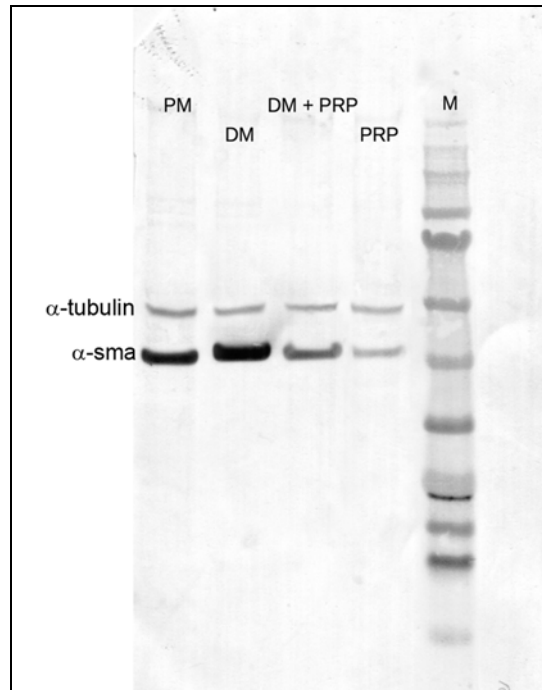

**Figure S1.** Original western blot of  $\alpha$ -sma and  $\alpha$ -tubulin expression of Figure 1 g. M: marker (Protein Marker VI (10 - 245) prestained, PanReac Applichem, VWR, Milan, Italy).

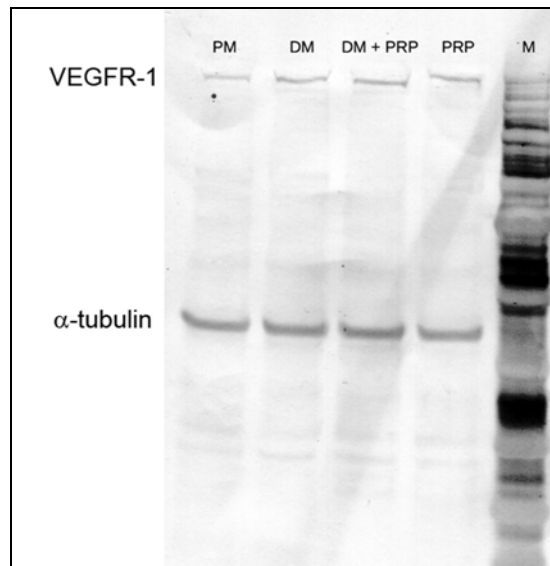

**Figure S2.** Original western blot of VEGFR-1 and  $\alpha$ -tubulin expression of Figure 4a. M: marker (Protein Marker VI (10 - 245) prestained, PanReac Applichem).

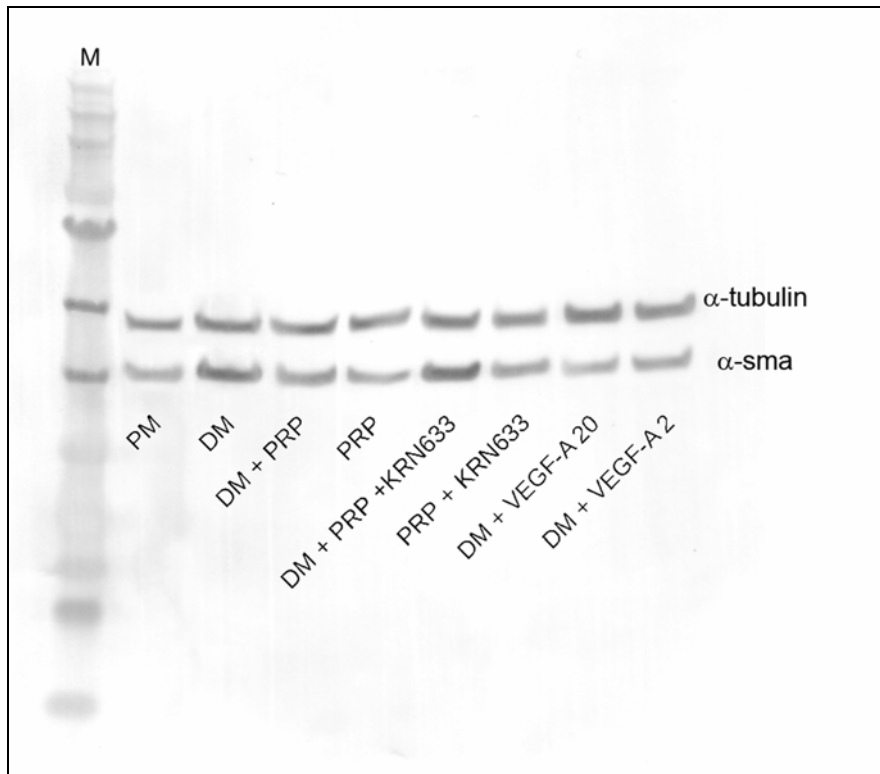

**Figure S3.** Original western blot of  $\alpha$ -sma and  $\alpha$ -tubulin expression of Figure 6a. M: marker (Protein Marker VI (10 - 245) prestained, PanReac Applichem).

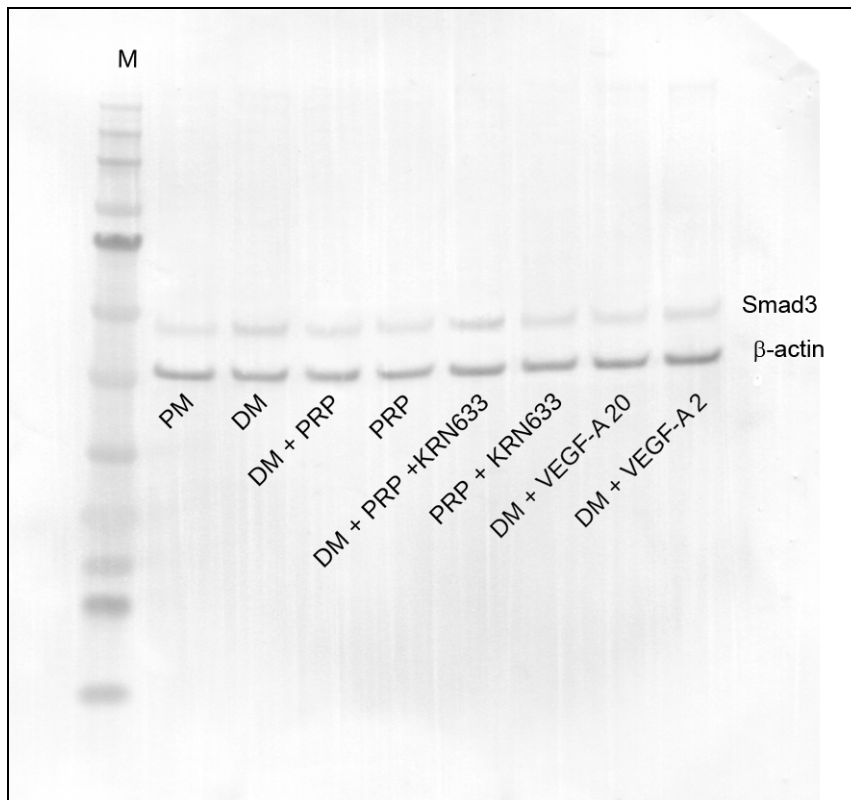

**Figure S4.** Original western blot of Smad3 and  $\beta$ -actin expression of Figure 7a. M: marker (Protein Marker VI (10 - 245) prestained, PanReac Applichem).

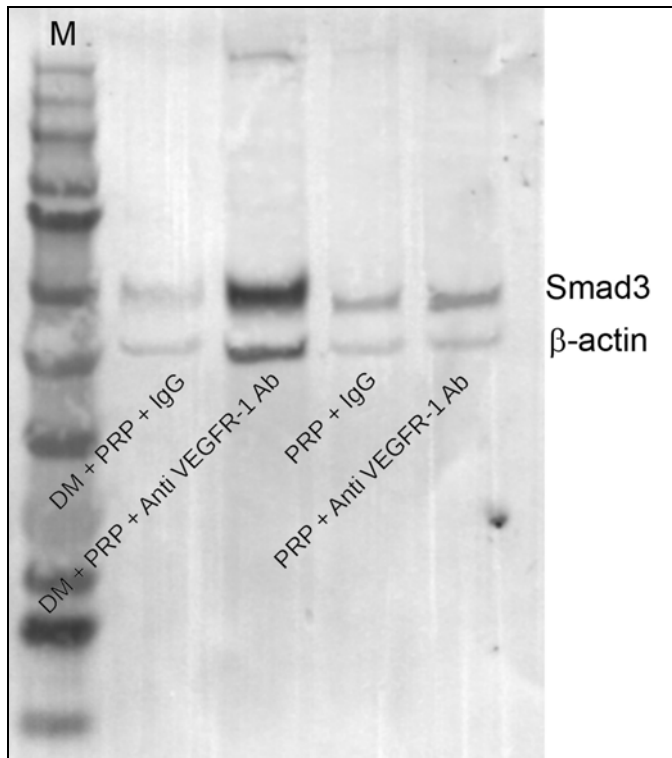

**Figure S5.** Original western blot of Smad3 and  $\beta$ -actin expression of Figure 7b. M: marker (Protein Marker VI (10 - 245) prestained, PanReac Applichem).
